# Supplementary material
Source: PubMed Central journal article supplement (PMC3696807)
Supplement: 1222568110_pnas.201222568SI.pdf [file 1222568110_pnas.201222568SI.pdf]

# Supporting Information

Cerling et al. 10.1073/pnas.1222568110

## SI Methods

**Sampling and Analytical Methods.** Hominin teeth were sampled and analyzed as described in *Methods*. Results are presented in Table S1.

**Isotope Enrichment Factors for Mammals.** In our discussion, we estimate that the isotope enrichment for primates is likely *ca.* 14‰ (1). Thus, a pure C<sub>3</sub> diet would have a tooth enamel value of *ca.* -12‰ in mesic environments (i.e., *ca.* -26‰ for mesic pre-Industrial C<sub>3</sub> plants), whereas a pure C<sub>4</sub> diet would have a δ<sup>13</sup>C value of *ca.* +2‰ to +4‰ (i.e., δ<sup>13</sup>C<sub>1750</sub> values of -12‰ to -10‰ for pre-Industrial C<sub>4</sub> plants). These nominal values of -26‰ and -12‰ for C<sub>3</sub> and C<sub>4</sub> plants, respectively, along with an enrichment of 14‰ for diet bioapatite will be used for discussions concerning the fraction of C<sub>3</sub>- and C<sub>4</sub>-based resources in diets.

**Stratigraphic Information and Age Estimates for Hominins.** Age ranges for hominins are based on their stratigraphic position relative relationship to the >350 layers of volcanic ash in the basin, of which >40 layers now have precise K-Ar or <sup>40</sup>Ar/<sup>39</sup>Ar dates (2–6). These ages are further constrained by paleomagnetic information in some sections (2–6). In most instances, ages of hominins were computed by linear interpolation between stratigraphic levels of known age and the stratigraphic level of the hominin in question, but in some instances, the age was computed by linear extrapolation above or below stratigraphic levels of known age. Stratigraphic markers for individual hominins are given in Table S2.

**Statistical Treatment.** ANOVA and other statistical analyses were performed using JMP.

**Taxonomic Assignments of Hominins.** Taxonomic assignments are based on the material analyzed for stable isotope studies. Our sampling strategy has been to analyze only broken enamel surfaces so as not to disturb primary surfaces that might be of use to taxonomists and morphologists. Therefore, in some cases, we analyzed fragmentary material found in association with more complete fossils. Although it has been formerly assumed that this material is derived from the same organism, it is possible that, in some cases, this fragmentary material derives from a different individual and perhaps, even a different taxon. We use the identifications in Wood's (7) monograph on the Koobi Fora hominins and the recent compilation of Omo-Turkana Basin hominins (8) as a starting point. Several samples have had a history of being difficult to assign to a particular taxon, because they do not fit neatly in either *Paranthropus* or *Homo*; five such samples (KNM-ER 1482, 2593, 2607, 5431, and 42705) are assigned to Hominidae indet.

**Biome Classification.** The discussion of biomes is based on the United Nations Educational, Scientific, and Cultural Organization classification for African vegetation (9), which is primarily based on the fraction of woody cover; we further subdivide that nomenclature to allow better description of the continuum between 0% and 100% woody canopy cover. Woody cover percentages are used to describe biomes: grasslands, 0–10%; open woody grasslands, 10–20%; woody grasslands, 20–40%; grassy woodlands/bushlands/shrublands, 40–60%; woodlands/bushlands/shrublands, 60–80%; forests, 80–100%. These definitions and nomenclature are used to estimate the percentage woody cover in the geological record based on paleosols (10).

1. Cerling TE, Harris JM (1999) Carbon isotope fractionation between diet and bioapatite in ungulate mammals and implications for ecological and paleoecological studies. *Oecologia* 120:347–363.
2. Brown FH, Sarna-Wojcicki AM, Meyer CE, Haileab B (1992) Correlation of Pliocene and Quaternary tephra layers between the Turkana Basin of East Africa and the Gulf of Aden. *Quat Int* 13/14:55–67.
3. Brown FH, Haileab B, McDougall I (2006) Sequence of tuffs between the KBS Tuff and the Chari Tuff in the Turkana Basin, Kenya and Ethiopia. *J Geol Soc London* 163:185–204.
4. McDougall I, Brown FH (2006) Precise <sup>40</sup>Ar/<sup>39</sup>Ar geochronology for the upper Koobi Fora Formation, Turkana Basin, northern Kenya. *J Geol Soc London* 163:205–220.
5. McDougall I, Brown FH (2008) Geochronology of the pre-KBS Tuff sequence, Omo Group, Turkana Basin. *J Geol Soc London* 165:549–562.
6. McDougall I, et al. (2012) New single crystal <sup>40</sup>Ar/<sup>39</sup>Ar ages improve time scale for deposition of the Omo Group, Omo-Turkana Basin, East Africa. *J Geol Soc London* 169:213–226.
7. Wood BA (1991) *Koobi Fora Research Project Volume 4: Hominid Cranial Remains* (Oxford Univ Press, Oxford), Vol 4.
8. Wood BA, Leakey MG (2011) The Omo-Turkana Basin fossil hominins and their contribution to our understanding of human evolution in Africa. *Evol Anthropol* 20(6):264–292.
9. White F (1983) *The Vegetation of Africa* (United Nations Scientific and Cultural Organization, Paris), Vol 20.
10. Cerling TE, et al. (2011) Woody cover and hominin environments in the past 6 million years. *Nature* 476(7358):51–56.



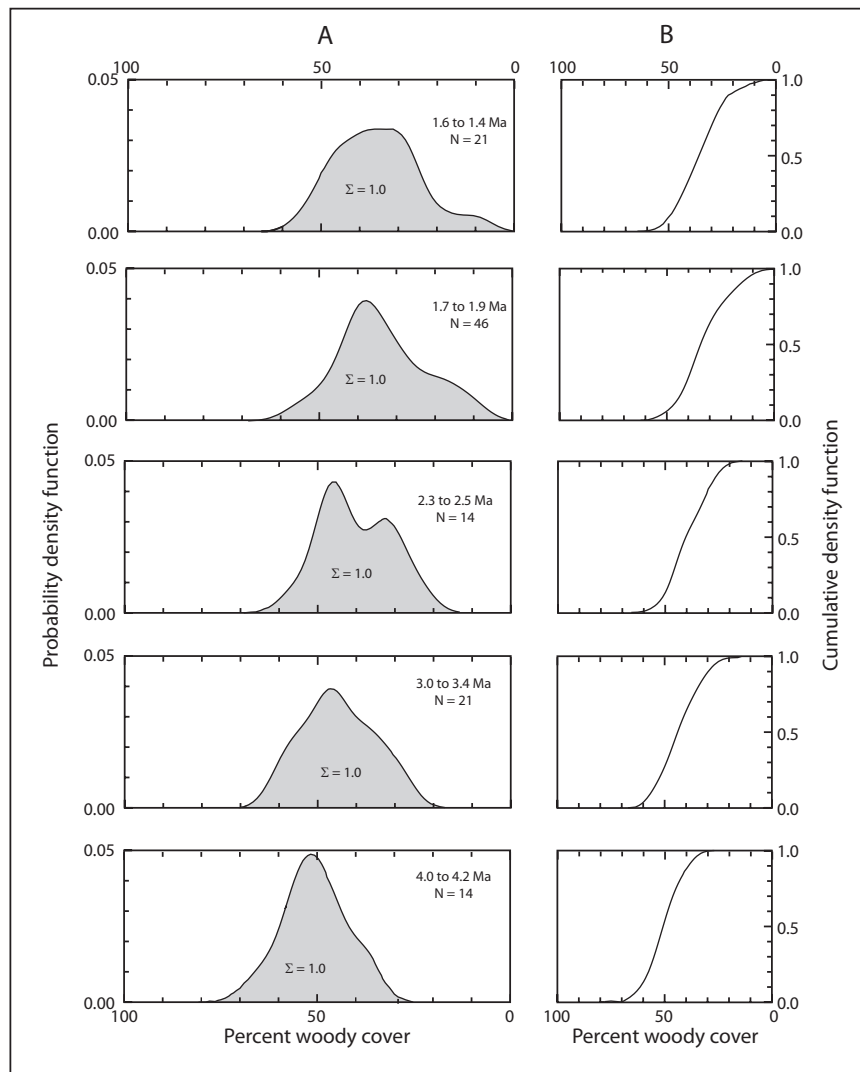

**Fig. S3.** Estimates of woody cover based on paleosols from the Nachukui and Koobi Fora Formations, Turkana Basin, using data from refs. 1 and 2 and methods from ref. 3, with samples chosen to correspond to time intervals discussed in the text. (A) Probability density functions summed for all paleosols for each time interval. (B) Cumulative density function from A for each time interval.

1. Levin NE, Brown FH, Behrensmeyer AK, Bobe R, Cerling TE (2011) Paleosol carbonates from the Omo Group: Isotopic records of local and regional environmental change in East Africa. *Palaeogeogr Palaeoecol Palaeoclim* 307:75–89.
2. Wynn JG (2000) Paleosols, stable carbon isotopes, and paleoenvironmental interpretation of Kanapoi, Northern Kenya. *J Hum Evol* 39(4):411–432.
3. Cerling TE, et al. (2011) Woody cover and hominin environments in the past 6 million years. *Nature* 476(7358):51–56.

**Table S1. Stable isotope values of hominins in this study grouped by age**

| Specimen no.  | Element     | Taxon                             | $\delta^{13}\text{C}$ | $\delta^{18}\text{O}$ | Age (Ma) | $\pm$ (Ma) |
|---------------|-------------|-----------------------------------|-----------------------|-----------------------|----------|------------|
| 4.12–3.95 Ma  |             |                                   |                       |                       |          |            |
| KNM-ER 18540  | m frag      | <i>Australopithecus anamensis</i> | −11.3                 | −0.6                  | 4.00     | 0.05       |
| KNM-ER 20420  | lt M2       | <i>Au. anamensis</i>              | −10.8                 | −0.1                  | 4.00     | 0.05       |
| KNM-KP 29287  | rt m1       | <i>Au. anamensis</i>              | −9.9                  | 0.1                   | 4.06     | 0.04       |
| KNM-KP 29287  | rt m2       | <i>Au. anamensis</i>              | −9.5                  | −0.5                  | 4.06     | 0.04       |
| KNM-KP 29287  | rt m3       | <i>Au. anamensis</i>              | −10.3                 | −0.4                  | 4.06     | 0.04       |
| KNM-KP 29287  | lt m3       | <i>Au. anamensis</i>              | −10.9                 | 0.4                   | 4.06     | 0.04       |
| KNM-KP 29287A | lt m2       | <i>Au. anamensis</i>              | −10.3                 | 0.4                   | 4.06     | 0.04       |
| KNM-ER 30200B | lt M3       | <i>Au. anamensis</i>              | −11.6                 | −0.1                  | 4.00     | 0.05       |
| KNM-KP 30498D | lt M3       | <i>Au. anamensis</i>              | −11.6                 | 1.0                   | 4.12     | 0.04       |
| KNM-KP 30502D | rt m3       | <i>Au. anamensis</i>              | −9.3                  | −1.7                  | 4.12     | 0.04       |
| KNM-KP 30502E | lt m3       | <i>Au. anamensis</i>              | −9.7                  | −1.1                  | 4.12     | 0.04       |
| KNM-ER 30745  | lt M3       | <i>Au. anamensis</i>              | −10.0                 | 1.3                   | 4.00     | 0.05       |
| KNM-KP 35839  | lt P3       | <i>Au. anamensis</i>              | −11.3                 | 0.3                   | 4.12     | 0.04       |
| KNM-KP 35840A | lt M3       | <i>Au. anamensis</i>              | −11.0                 | 1.7                   | 4.12     | 0.04       |
| KNM-KP 35842  | M           | <i>Au. anamensis</i>              | −10.3                 | —                     | 4.12     | 0.04       |
| KNM-KP 35847  | lt m2       | <i>Au. anamensis</i>              | −12.0                 | 1.3                   | 4.12     | 0.04       |
| KNM-KP 35851  | lt M3       | <i>Au. anamensis</i>              | −11.3                 | 1.1                   | 4.12     | 0.04       |
| 3.4–3.0 Ma    |             |                                   |                       |                       |          |            |
| KNM-WT 8556B  | m           | <i>Kenyanthropus platyops</i>     | −6.6                  | −3.3                  | 3.24     | 0.10       |
| KNM-WT 16006  | lt m2       | <i>K. platyops</i>                | −5.4                  | −3.3                  | 3.37     | 0.05       |
| KNM-WT 22936  | rt m1       | <i>K. platyops</i>                | −9.2                  | 0.1                   | 3.40     | 0.20       |
| KNM-LT 23181  | rt dM2      | <i>K. platyops</i>                | −4.9                  | 0.9                   | 3.30     | 0.20       |
| KNM-LT 23182  | rt m3       | <i>K. platyops</i>                | −5.9                  | 0.5                   | 3.30     | 0.20       |
| KNM-LT 25936  | P frag      | <i>K. platyops</i>                | −8.9                  | −1.7                  | 3.30     | 0.20       |
| KNM-WT 38332  | rt M2       | <i>K. platyops</i>                | −2.7                  | −2.3                  | 3.37     | 0.05       |
| KNM-WT 38335  | M           | <i>K. platyops</i>                | −5.6                  | −3.5                  | 3.24     | 0.10       |
| KNM-WT 38338  | M2          | <i>K. platyops</i>                | −9.9                  | −3.3                  | 3.30     | 0.10       |
| KNM-WT 38342  | lt m1       | <i>K. platyops</i>                | −11.1                 | −3.2                  | 3.30     | 0.10       |
| KNM-WT 38344  | m1 or m2    | <i>K. platyops</i>                | −3.7                  | −3.7                  | 3.03     | 0.10       |
| KNM-WT 38346  | M           | <i>K. platyops</i>                | −8.8                  | 0.8                   | 3.20     | 0.10       |
| KNM-WT 38350  | lt M        | <i>K. platyops</i>                | −11.1                 | −1.2                  | 3.24     | 0.10       |
| KNM-WT 38356  | M1 or M2    | <i>K. platyops</i>                | −3.0                  | −2.5                  | 3.03     | 0.10       |
| KNM-WT 38358B | lt m2       | <i>K. platyops</i>                | −4.7                  | −1.6                  | 3.20     | 0.10       |
| KNM-WT 38358C | lt m3       | <i>K. platyops</i>                | −3.3                  | −1.2                  | 3.20     | 0.10       |
| KNM-WT 38358D | lt m1       | <i>K. platyops</i>                | −3.7                  | −0.1                  | 3.20     | 0.10       |
| KNM-WT 38358F | rt M3       | <i>K. platyops</i>                | −4.0                  | −0.3                  | 3.20     | 0.10       |
| KNM-WT 38359  | m1 or m2    | <i>K. platyops</i>                | −4.0                  | −0.4                  | 3.23     | 0.10       |
| KNM-WT 38361H | lt P4       | <i>K. platyops</i>                | −7.2                  | −1.7                  | 3.24     | 0.10       |
| KNM-WT 38362B | lt M1 or M2 | <i>K. platyops</i>                | −6.6                  | −2.3                  | 3.24     | 0.10       |
| KNM-ER 5431F  | lt p4       | Hominini indet.                   | −4.3                  | 1.5                   | 3.10     | 0.10       |
| 2.25–2.55 Ma  |             |                                   |                       |                       |          |            |
| KNM-WT 16005  | lt m2       | <i>Paranthropus aethiopicus</i>   | −5.1                  | −0.2                  | 2.45     | 0.05       |
| KNM-WT 17000  | lt M2       | <i>P. aethiopicus</i>             | −0.3                  | −2.7                  | 2.52     | 0.05       |
| KNM-WT 38351  | lt M frag   | <i>P. aethiopicus</i>             | −4.7                  | 3.8                   | 2.30     | 0.05       |
| KNM-WT 38353A | m1 or m2    | <i>P. aethiopicus</i>             | −4.6                  | 4.2                   | 2.30     | 0.05       |
| KNM-WT 38353B | lt m1 or m2 | <i>P. aethiopicus</i>             | −4.4                  | 3.0                   | 2.30     | 0.05       |
| KNM-WT 42718  | rt m1       | <i>Homo</i> sp.                   | −7.2                  | −4.4                  | 2.29     | 0.03       |
| 1.99–1.67 Ma  |             |                                   |                       |                       |          |            |
| KNM-ER 816B   | M frag      | <i>P. cf boisei</i>               | −1.9                  | −1.3                  | 1.73     | 0.03       |
| KNM-ER 3952F  | lt M3       | <i>P. cf boisei</i>               | −1.2                  | 0.0                   | 1.82     | 0.05       |
| KNM-ER 732A   | rt P4       | <i>P. boisei</i>                  | −0.1                  | −1.8                  | 1.78     | 0.10       |
| KNM-ER 810    | p3          | <i>P. boisei</i>                  | −3.4                  | −3.3                  | 1.73     | 0.03       |
| KNM-ER 1469A  | lt m3       | <i>P. boisei</i>                  | −2.3                  | −0.1                  | 1.93     | 0.04       |
| KNM-ER 1479A  | m3          | <i>P. boisei</i>                  | −2.3                  | 0.2                   | 1.82     | 0.05       |
| KNM-ER 1804   | lt M3       | <i>P. boisei</i>                  | −1.2                  | −0.7                  | 1.73     | 0.03       |
| KNM-ER 1806C  | rt m3       | <i>P. boisei</i>                  | −1.3                  | −2.0                  | 1.76     | 0.04       |
| KNM-ER 13750  | m frag      | <i>P. boisei</i>                  | 0.2                   | 0.5                   | 1.82     | 0.05       |
| KNM-ER 15940  | lt m3       | <i>P. boisei</i>                  | −1.1                  | −0.6                  | 1.73     | 0.03       |
| KNM-WT 17396  | lt m3       | <i>P. boisei</i>                  | −1.9                  | −3.1                  | 1.77     | 0.03       |
| KNM-WT 37100  | m2 or m3    | <i>P. boisei</i>                  | −1.8                  | −1.5                  | 1.77     | 0.03       |
| KNM-WT 37748  | rt M3       | <i>P. boisei</i>                  | −2.1                  | 0.0                   | 1.77     | 0.03       |
| KNM-ER 1478A  | m frag      | <i>Homo</i> sp.                   | −8.6                  | 1.3                   | 1.82     | 0.05       |

Table S1. Cont.

| Specimen no.  | Element     | Taxon               | $\delta^{13}\text{C}$ | $\delta^{18}\text{O}$ | Age (Ma) | $\pm$ (Ma) |
|---------------|-------------|---------------------|-----------------------|-----------------------|----------|------------|
| KNM-ER 1478A  | M2          | <i>Homo</i> sp.     | -8.1                  | 0.0                   | 1.82     | 0.05       |
| KNM-ER 1483E  | m frag      | <i>Homo</i> sp.     | -7.5                  | 2.4                   | 1.89     | 0.03       |
| KNM-ER 1593C  | m1          | <i>Homo</i> sp.     | -7.4                  | 2.1                   | 1.80     | 0.07       |
| KNM-ER 1802B  | lt M3 or m3 | <i>Homo</i> sp.     | -6.4                  | -1.2                  | 1.97     | 0.03       |
| KNM-ER 1805   | lt m1       | <i>Homo</i> sp.     | -7.7                  | -2.4                  | 1.76     | 0.04       |
| KNM-ER 1814E  | m3          | <i>Homo</i> sp.     | -6.6                  | 0.6                   | 1.67     | 0.10       |
| KNM-ER 2599   | lt p4       | <i>Homo</i> sp.     | -9.9                  | -1.6                  | 1.86     | 0.03       |
| KNM-ER 2600   | m-frag      | <i>Homo</i> sp.     | -6.1                  | -1.0                  | 1.82     | 0.05       |
| KNM-ER 3734   | lt m3       | <i>Homo</i> sp.     | -5.8                  | 1.2                   | 1.95     | 0.03       |
| KNM-ER 7330   | rt P3       | <i>Homo</i> sp.     | -5.5                  | 2.3                   | 1.83     | 0.04       |
| KNM-WT 37745  | rt p3       | <i>Homo</i> sp.     | -6.4                  | -0.2                  | 1.75     | 0.05       |
| KNM-ER 45501  | m frag      | <i>Homo</i> sp.     | -5.8                  | -0.7                  | 1.85     | 0.10       |
| KNM-ER 45502  | lt m1 or m2 | <i>Homo</i> sp.     | -3.9                  | 3.4                   | 1.85     | 0.10       |
| KNM-ER 45503  | M2 or M3    | <i>Homo</i> sp.     | -8.6                  | 1.7                   | 1.85     | 0.10       |
| KNM-ER 62000  | rt M1       | <i>Homo</i> sp.     | -7.2                  | 0.6                   | 1.97     | 0.04       |
| KNM-ER 1482A  | lt m2       | Hominini indet.     | -0.4                  | 1.8                   | 1.99     | 0.05       |
| KNM-ER 2607   | m frag      | Hominini indet.     | -9.2                  | 2.6                   | 1.73     | 0.10       |
| 1.65–1.46 Ma  |             |                     |                       |                       |          |            |
| KNM-ER 3887   | rt M3       | <i>P. cf boisei</i> | -1.7                  | -2.9                  | 1.46     | 0.03       |
| KNM-ER 729A   | lt p4       | <i>P. boisei</i>    | 0.0                   | -0.7                  | 1.53     | 0.03       |
| KNM-ER 733A   | rt m3       | <i>P. boisei</i>    | -1.5                  | -2.6                  | 1.52     | 0.03       |
| KNM-ER 733D   | lt P4       | <i>P. boisei</i>    | -0.5                  | -2.2                  | 1.52     | 0.03       |
| KNM-ER 801C   | lt m3       | <i>P. boisei</i>    | 0.4                   | -1.8                  | 1.59     | 0.04       |
| KNM-ER 802D   | lt m1       | <i>P. boisei</i>    | -0.1                  | -1.7                  | 1.59     | 0.04       |
| KNM-ER 802G   | m3          | <i>P. boisei</i>    | -1.9                  | 0.0                   | 1.59     | 0.04       |
| KNM-ER 818    | lt m3       | <i>P. boisei</i>    | 0.7                   | 1.9                   | 1.50     | 0.05       |
| KNM-ER 1171C  | lt m1       | <i>P. boisei</i>    | -0.6                  | -1.9                  | 1.59     | 0.04       |
| KNM-ER 1819   | m3          | <i>P. boisei</i>    | 0.9                   | -0.7                  | 1.60     | 0.10       |
| KNM-ER 3737B  | rt m1       | <i>P. boisei</i>    | -1.6                  | -2.5                  | 1.59     | 0.04       |
| KNM-ER 6080   | rt m2       | <i>P. boisei</i>    | -2.2                  | -0.6                  | 1.52     | 0.03       |
| KNM-ER 6082   | lt p3       | <i>P. boisei</i>    | -0.8                  | 1.1                   | 1.50     | 0.04       |
| KNM-ER 15951F | m frag      | <i>P. boisei</i>    | -3.3                  | -0.9                  | 1.52     | 0.03       |
| KNM-ER 730A   | lt m1       | <i>Homo</i>         | -2.6                  | -0.7                  | 1.54     | 0.05       |
| KNM-ER 807    | lt M1       | <i>Homo</i>         | -5.6                  | -1.7                  | 1.52     | 0.05       |
| KNM-ER 807    | lt M2       | <i>Homo</i>         | -5.2                  | -2.2                  | 1.52     | 0.05       |
| KNM-ER 808G   | rt M1       | <i>Homo</i>         | -5.1                  | -2.2                  | 1.52     | 0.03       |
| KNM-ER 809A   | lt m1       | <i>Homo</i>         | -5.0                  | -2.6                  | 1.53     | 0.03       |
| KNM-ER 820    | lt dm2      | <i>Homo</i>         | -3.5                  | -0.2                  | 1.51     | 0.05       |
| KNM-ER 992B   | lt c        | <i>Homo</i>         | -5.0                  | 0.6                   | 1.46     | 0.03       |
| KNM-ER 1808I  | m frag      | <i>Homo</i>         | -2.6                  | -3.7                  | 1.59     | 0.03       |
| KNM-ER 3733   | lt M1       | <i>Homo</i>         | -4.6                  | -2.8                  | 1.65     | 0.05       |
| KNM-ER 3733   | lt M2       | <i>Homo</i>         | -3.8                  | -2.8                  | 1.65     | 0.05       |
| KNM-ER 2593   | m frag      | Hominini indet.     | -0.8                  | -0.4                  | 1.55     | 0.05       |
| KNM-ER 42705  | m3 frag     | Hominini indet.     | -2.0                  | -2.4                  | 1.59     | 0.04       |
| 0.01 Ma       |             |                     |                       |                       |          |            |
| KNM-LT 13700b | rt m2       | <i>H. sapiens</i>   | -6.9                  | -0.9                  | 0.01     | 0.005      |
| KNM-LT 13700b | rt m3       | <i>H. sapiens</i>   | -5.4                  | -1.3                  | 0.01     | 0.005      |
| KNM-LT 27714B | lt m2       | <i>H. sapiens</i>   | -2.2                  | -0.9                  | 0.01     | 0.005      |
| KNM-LT 27719C | rt M2       | <i>H. sapiens</i>   | -2.6                  | -1.5                  | 0.01     | 0.005      |
| KNM-WT 38400  | lt m1       | <i>H. sapiens</i>   | -6.8                  | -0.9                  | 0.01     | 0.005      |

Specimen numbers are from the National Museums of Kenya (KNM). m frag, molar fragment; lt, left; rt, right; m, lower molar; M, upper molar; p, lower premolar; P, upper premolar.

**Table S2.  $\delta^{13}\text{C}$  and  $\delta^{18}\text{O}$  values for tooth enamel from primates in East and Central Africa**

| Sample         | Species                  | Tooth | $\delta^{13}\text{C}$ | $\delta^{13}\text{C}_{1750}$ | $\delta^{18}\text{O}$ | Year of death | Country  | Location         | Source     |
|----------------|--------------------------|-------|-----------------------|------------------------------|-----------------------|---------------|----------|------------------|------------|
| ICCN-KB-064    | <i>Gorilla beringei</i>  | M1    | -16.8                 | -15.1                        | -3.0                  | 2004          | DRC      | Kahuzi-Biega     | This study |
| ICCN-KB-065    | <i>G. beringei</i>       | M1    | -17.8                 | -16.2                        | -3.8                  | 1996          | DRC      | Kahuzi-Biega     | This study |
| ICCN-KB-066    | <i>G. beringei</i>       | M3    | -14.0                 | -12.5                        | -4.1                  | 1997          | DRC      | Kahuzi-Biega     | This study |
| ICCN-KB-070    | <i>G. beringei</i>       | M3    | -15.1                 | -13.3                        | -3.9                  | 2003          | DRC      | Kahuzi-Biega     | This study |
| ICCN-KB-078    | <i>G. beringei</i>       | m1    | -15.9                 | -14.3                        | -3.8                  | 1997          | DRC      | Kahuzi-Biega     | This study |
| ICCN-KB-078    | <i>G. beringei</i>       | m2    | -14.1                 | -12.6                        | -3.6                  | 1997          | DRC      | Kahuzi-Biega     | This study |
| ICCN-KB-088    | <i>G. beringei</i>       | m2    | -14.2                 | -12.6                        | -3.0                  | 1997          | DRC      | Kahuzi-Biega     | This study |
| ICCN-KB-089    | <i>G. beringei</i>       | m3    | -14.9                 | -13.3                        | -5.2                  | 1997          | DRC      | Kahuzi-Biega     | This study |
| L3150 E        | <i>G. beringei</i>       | P3    | -15.4                 | -14.6                        | -4.3                  | 1972          | DRC      | Kahuzi-Biega     | This study |
| ICCN-WCS-022   | <i>G. beringei</i>       | P4    | -14.8                 | -13.2                        | -2.9                  | 1996          | DRC      | Itombwe massif   | This study |
| ICCN-WCS-040   | <i>G. beringei</i>       | M3    | -13.3                 | -11.7                        | -5.7                  | 1996          | DRC      | Itombwe massif   | This study |
| ICCN-WCS-074   | <i>G. beringei</i>       | m3    | -13.0                 | -11.5                        | -2.5                  | 1996          | DRC      | Itombwe massif   | This study |
| ICCN-WCS-075   | <i>G. beringei</i>       | C     | -14.3                 | -12.8                        | -4.5                  | 1996          | DRC      | Itombwe massif   | This study |
| ICCN-WCS-075   | <i>G. beringei</i>       | M2    | -14.4                 | -12.9                        | -3.5                  | 1996          | DRC      | Itombwe massif   | This study |
| ICCN-WCS-076   | <i>G. beringei</i>       | M2    | -15.5                 | -13.9                        | -4.6                  | 1996          | DRC      | Itombwe massif   | This study |
| CEF-048        | <i>Cercopithecus</i> sp. | M3    | -15.8                 | -14.3                        | -0.2                  | 1995          | DRC      | Ituri            | 1          |
| CEF-249        | <i>Cercopithecus</i> sp. | M3    | -16.9                 | -15.3                        | 0.7                   | 1995          | DRC      | Ituri            | 1          |
| ICCN-KB-072    | <i>Cercopithecus</i> sp. | M3    | -14.9                 | -13.2                        | -2.9                  | 2002          | DRC      | Kahuzi-Beiga     | This study |
| ICCN-KB-072    | <i>Cercopithecus</i> sp. | M2    | -14.6                 | -12.8                        | -4.2                  | 2002          | DRC      | Kahuzi-Beiga     | This study |
| ET05-AA-M152   | <i>C. aethiops</i>       | Im2   | -14.3                 | -13.5                        | 6.1                   | 1965          | Ethiopia | Bulbula          | 2          |
| ET05-AA-M151   | <i>C. aethiops</i>       | Im    | -14.0                 | -13.2                        | 5.4                   | 1965          | Ethiopia | Bulbula          | 2          |
| ET05-AA-M299   | <i>C. aethiops</i>       | M     | -13.4                 | -12.6                        | 3.8                   | 1965          | Ethiopia | Bulbula          | 2          |
| ET05-AA-M191   | <i>C. aethiops</i>       | m2    | -12.3                 | -11.5                        | 2.6                   | 1965          | Ethiopia | Debre Zehir      | 2          |
| ET05-AA-M146   | <i>C. neglectus</i>      | M2    | -16.5                 | -15.7                        | 0.2                   | 1965          | Ethiopia | Godare           | 2          |
| CEF-239        | <i>Colobus</i> sp.       | M3    | -16.1                 | -14.6                        | 4.9                   | 1995          | DRC      | Ituri            | 1          |
| JAH-015        | <i>Colobus</i> sp.       | m3    | -16.5                 | -15.0                        | 6.8                   | 1995          | DRC      | Ituri            | 1          |
| CEF-182        | <i>Colobus</i> sp.       | M3    | -16.5                 | -15.0                        | 0.1                   | 1995          | DRC      | Ituri            | 1          |
| L15359         | <i>Colobus</i> sp.       | C     | -17.0                 | -16.3                        | -0.2                  | 1966          | DRC      | unk              | This study |
| ICCN-KB-063    | <i>Colobus</i> sp.       | M2    | -14.6                 | -12.8                        | -1.5                  | 2004          | DRC      | Kahuzi-Beiga     | This study |
| CEF-135        | <i>Pan troglodytes</i>   | M2    | -16.0                 | -14.5                        | -1.1                  | 1995          | DRC      | Ituri            | 1          |
| WCS-041        | <i>P. troglodytes</i>    | M2    | -15.1                 | -13.5                        | -3.1                  | 1996          | DRC      | Itombwe massif   | This study |
| CEF-207        | <i>Papio anubis</i>      | M3    | -17.1                 | -15.5                        | -1.4                  | 1995          | DRC      | Ituri            | 1          |
| K98-Lai-306-M3 | <i>P. anubis</i>         | M3    | -4.1                  | -2.5                         | 4.4                   | 1997          | Kenya    | Laikipia         | This study |
| K98-Lai-344    | <i>P. anubis</i>         | M3    | -6.8                  | -5.2                         | 4.9                   | 1998          | Kenya    | Laikipia         | This study |
| K97-231-Lai    | <i>P. anubis</i>         | M2    | -4.8                  | -3.3                         | 8.1                   | 1997          | Kenya    | Laikipia         | This study |
| 87-OLOR-625    | <i>P. anubis</i>         | M2    | -10.5                 | -9.2                         | 4.3                   | 1987          | Kenya    | Olgorgesailie    | This study |
| 95-OLOR-235    | <i>P. anubis</i>         | m2    | -11.1                 | -9.6                         | 4.1                   | 1995          | Kenya    | Olgorgesailie    | This study |
| K98-Tsv-147    | <i>P. anubis</i>         | m2    | -8.8                  | -7.4                         | 1.7                   | 1994          | Kenya    | Tsavo            | This study |
| K98-Tsv-148    | <i>P. anubis</i>         | m3    | -12.3                 | -10.8                        | 1.5                   | 1994          | Kenya    | Tsavo            | This study |
| SU96:5         | <i>P. anubis</i>         | M3    | -12.5                 | -10.9                        | 4.8                   | 1996          | Kenya    | Turkana          | This study |
| L4180          | <i>P. anubis</i>         | C     | -13.6                 | -12.9                        | -2.3                  | 1958          | DRC      | eastern DRC      | This study |
| L5450          | <i>P. anubis</i>         | C     | -13.2                 | -12.5                        | -1.5                  | 1959          | DRC      | Kisoro/Rutsuru   | This study |
| L5148          | <i>P. anubis</i>         | P4    | -11.3                 | -10.5                        | -2.7                  | 1959          | DRC      | Chagulube/Kalehe | This study |
| L5593          | <i>P. anubis</i>         | I     | -10.3                 | -9.6                         | -2.1                  | 1959          | DRC      | Nyamukubi/Kalehe | This study |
| ET05-BM-09     | <i>P. anubis</i>         | M3    | -14.1                 | -12.4                        | -1.3                  | 2000          | Ethiopia | Bale NP          | 2          |
| ET05-MAGO-02   | <i>P. anubis</i>         | M3    | -14.0                 | -12.3                        | -0.3                  | 2000          | Ethiopia | Mago NP          | 2          |
| ET05-NCHSR-08  | <i>P. anubis</i>         | M2    | -14.5                 | -12.8                        | 3.9                   | 2000          | Ethiopia | Nechisar NP      | 2          |
| ET05-NCHSR-14  | <i>P. anubis</i>         | M3    | -11.0                 | -9.3                         | -1.5                  | 2000          | Ethiopia | Nechisar NP      | 2          |
| ET05-NCHSR-14  | <i>P. anubis</i>         | P     | -13.2                 | -11.5                        | 1.3                   | 2000          | Ethiopia | Nechisar NP      | 2          |
| LS-1           | <i>Papio hamadryas</i>   | M3    | -6.4                  | -4.7                         | -0.6                  | 2000          | Ethiopia | Awash NP         | 2          |
| LS-2           | <i>P. hamadryas</i>      | M3    | -12.1                 | -10.4                        | 1.1                   | 2000          | Ethiopia | Awash NP         | 2          |
| LS-3           | <i>P. hamadryas</i>      | M3    | -11.8                 | -10.1                        | -0.2                  | 2000          | Ethiopia | Awash NP         | 2          |
| GON04M-88      | <i>P. hamadryas</i>      | m3    | -12.1                 | -10.4                        | 0.6                   | 2000          | Ethiopia | Gona             | 2          |
| GON06NO-03     | <i>P. hamadryas</i>      | m2    | -11.9                 | -10.2                        | 1.9                   | 2000          | Ethiopia | Gona             | 2          |
| GON06NO-03     | <i>P. hamadryas</i>      | m3    | -12.0                 | -10.3                        | 2.2                   | 2000          | Ethiopia | Gona             | 2          |

Measured  $\delta^{13}\text{C}$  values have been corrected to 1750 based on the estimated year of death of the individual; this correction is because of the change in the  $\delta^{13}\text{C}$  value of the atmosphere from fossil fuel burning (3, 4). DRC, Democratic Republic of Congo.

1. Cerling TE, Hart JA, Hart TB (2004) Stable isotope ecology in the Ituri Forest. *Oecologia* 138(1):5–12.
2. Levin NE, et al. (2008) Herbivore enamel carbon isotopic composition and the environmental context of *Ardipithecus* at Gona, Ethiopia. *The Geology of Early Humans in the Horn of Africa*, Geological Society of America Special Paper, eds Quade J, Wynn JG (Geological Society of America, Boulder, CO), pp 215–234.
3. Francey RJ, et al. (1999) A 1000-year high precision record of  $\delta^{13}\text{C}$  in atmospheric CO<sub>2</sub>. *Tellus B Chem Phys Meteorol* 51:170–193.
4. Keeling RF, Piper SC, Bollenbacher AF, Walker SJ (2010) Monthly atmospheric  $^{13}\text{C}/^{12}\text{C}$  isotopic ratios for 11 SIO stations. *Trends: A Compendium of Data on Global Change* (Carbon Dioxide Information Analysis Center, Oak Ridge National Laboratory, US Department of Energy, Oak Ridge, TN).

**Table S3. Stratigraphic information used to determine age estimates for hominin fossils in the Turkana Basin**

| Specimen     | Formation  | Member        | Area/locality | Marker    | Level  | Age (Ma) | ±    |
|--------------|------------|---------------|---------------|-----------|--------|----------|------|
| KNM-ER 729   | Koobi Fora | Okote         | Area 8        | BPT       | 2      | 1.53     | 0.03 |
| KNM-ER 730   | Koobi Fora | KBS           | Area 103      | LKF       | -5     | 1.54     | 0.05 |
| KNM-ER 732   | Koobi Fora | KBS           | Area 10       | Upper KBS |        | 1.78     | 0.10 |
| KNM-ER 733   | Koobi Fora | Okote         | Area 8        | SubNILT   | -4     | 1.52     | 0.03 |
| KNM-ER 801   | Koobi Fora | Okote         | Area 6A       | LIL       | -8     | 1.59     | 0.04 |
| KNM-ER 802   | Koobi Fora | Okote         | Area 6A       | LIL       | -8     | 1.59     | 0.04 |
| KNM-ER 807   | Koobi Fora | Okote         | Area 8A       | 6159      | -2     | 1.52     | 0.05 |
| KNM-ER 808   | Koobi Fora | Okote         | Area 8        | SubNILT   | -5     | 1.52     | 0.03 |
| KNM-ER 809   | Koobi Fora | Okote         | Area 8        | BPT       | 2      | 1.53     | 0.03 |
| KNM-ER 810   | Koobi Fora | KBS           | Area 104      | A2        | -4     | 1.73     | 0.03 |
| KNM-ER 816   | Koobi Fora | KBS           | Area 104      | A2        | -4     | 1.73     | 0.03 |
| KNM-ER 818   | Koobi Fora | Okote         | Area 6        | ILN       | -2     | 1.50     | 0.05 |
| KNM-ER 820   | Koobi Fora | Okote         | Area 1        | SubNILT   | -2     | 1.51     | 0.05 |
| KNM-ER 992   | Koobi Fora | Okote         | Area 1        | ILN       | 10     | 1.46     | 0.03 |
| KNM-ER 1171  | Koobi Fora | Okote         | Area 6A       | LIL       | -8     | 1.59     | 0.04 |
| KNM-ER 1469  | Koobi Fora | Upper Burgi   | Area 131      | KBS       | -13    | 1.93     | 0.04 |
| KNM-ER 1478  | Koobi Fora | KBS           | Area 105      | KBS       | cc     | 1.82     | 0.05 |
| KNM-ER 1479  | Koobi Fora | KBS           | Area 105      | KBS       | cc     | 1.82     | 0.05 |
| KNM-ER 1482  | Koobi Fora | Upper Burgi   | Area 131      | KBS       | -26    | 1.99     | 0.05 |
| KNM-ER 1483  | Koobi Fora | Upper Burgi   | Area 131      | KBS       | -4     | 1.89     | 0.03 |
| KNM-ER 1593  | Koobi Fora | KBS           | Area 12       | KBS       | ca. C4 | 1.80     | 0.07 |
| KNM-ER 1802  | Koobi Fora | Upper Burgi   | Area 131      | GPC       | —      | 1.97     | 0.03 |
| KNM-ER 1804  | Koobi Fora | KBS           | Area 104      | A2        | -4     | 1.73     | 0.03 |
| KNM-ER 1805  | Koobi Fora | KBS           | Area 130      | KBS       | 11     | 1.76     | 0.04 |
| KNM-ER 1806  | Koobi Fora | KBS           | Area 130      | KBS       | 11     | 1.76     | 0.04 |
| KNM-ER 1808  | Koobi Fora | KBS           | Area 103      | A6        | -2     | 1.59     | 0.03 |
| KNM-ER 1814  | Koobi Fora | KBS           | Area 127      | KBS       |        | 1.67     | 0.10 |
| KNM-ER 1819  | Koobi Fora |               | Area 3        | None      |        | 1.60     | 0.10 |
| KNM-ER 2593  | Koobi Fora | Okote         | Area 6        | MIL       | +1     | 1.48     | 0.03 |
| KNM-ER 2599  | Koobi Fora | KBS           | Area 15       | KBS       | 2      | 1.86     | 0.03 |
| KNM-ER 2600  | Koobi Fora | KBS           | Area 130      | KBS       | cc     | 1.82     | 0.05 |
| KNM-ER 2607  | Koobi Fora | KBS           | Area 105      |           |        | 1.73     | 0.10 |
| KNM-ER 3733  | Koobi Fora | KBS           | Area 104      | White     | -1     | 1.65     | 0.05 |
| KNM-ER 3734  | Koobi Fora | KBS           | Area 105      | GPC       | 1      | 1.95     | 0.03 |
| KNM-ER 3737  | Koobi Fora | Okote         | Area 6A       | LIL       | -8     | 1.59     | 0.04 |
| KNM-ER 3887  | Koobi Fora | Okote         | Area 1        | ILN       | 10     | 1.46     | 0.03 |
| KNM-ER 3952  | Koobi Fora | KBS           | Area 105      | KBS       | cc     | 1.82     | 0.05 |
| KNM-ER 5431  | Koobi Fora | Tulu Bor      | Area 203      | TUL       |        | 3.20     | 0.10 |
| KNM-ER 6080  | Koobi Fora | Okote         | Area 8A       | SubNILT   | -4     | 1.52     | 0.03 |
| KNM-ER 6082  | Koobi Fora | Okote         | Area 8A       | ILN       | -2     | 1.50     | 0.04 |
| KNM-ER 7330  | Koobi Fora | KBS           | Area 107      | C4        | 0      | 1.83     | 0.04 |
| KNM-WT 8556  | Nachukui   | Lomekwi       | LO5           | TUL       | 17     | 3.24     | 0.10 |
| KNM-ER 13750 | Koobi Fora | KBS           | Area 105      | KBS       | cc     | 1.82     | 0.05 |
| KNM-ER 15940 | Koobi Fora | KBS           | Area 104      | A2        | -4     | 1.73     | 0.03 |
| KNM-ER 15951 | Koobi Fora | Okote         | Area 8        | SubNILT   | -3     | 1.52     | 0.03 |
| KNM-WT 16005 | Nachukui   | Lokalalei     | Kangatukuseo  | KU2       |        | 2.45     | 0.05 |
| KNM-WT 16006 | Nachukui   | Lomekwi       | LO4           | TUL       | 5      | 3.37     | 0.05 |
| KNM-WT 17000 | Nachukui   | Lokalelei     | LO1           | LKL       | 0      | 2.52     | 0.05 |
| KNM-WT 17396 | Nachukui   | Kaito         | Kokiselei KS1 |           |        | 1.77     | 0.03 |
| KNM-ER 18540 | Koobi Fora | Lonyumun      | Area 261      | MOI       | -5     | 4.00     | 0.05 |
| KNM-ER 20420 | Koobi Fora | Lonyumun      | Area 261      | MOI       | -5     | 4.00     | 0.05 |
| KNM-WT 22936 | Nachukui   | South Turkwel |               |           |        | 3.40     | 0.20 |
| KNM-LT 23181 | Nachukui   | Kaiyumung     |               |           |        | 3.30     | 0.20 |
| KNM-LT 23182 | Nachukui   | Kaiyumung     |               |           |        | 3.30     | 0.20 |
| KNM-LT 25936 | Nachukui   | Kaiyumung     |               |           |        | 3.30     | 0.20 |
| KNM-KP 29287 | Kanapoi    |               |               | KAN       | 3      | 4.06     | 0.04 |
| KNM-ER 30200 | Koobi Fora | Lonyumun      | Area 261      | MOI       | -5     | 4.00     | 0.05 |
| KNM-KP 30498 | Kanapoi    | —             |               |           |        | 4.12     | 0.04 |
| KNM-KP 30502 | Kanapoi    | —             |               |           |        | 4.12     | 0.04 |
| KNM-ER 30745 | Koobi Fora | Lonyumun      | Area 261      | MOI       | -5     | 4.00     | 0.05 |
| KNM-KP 35839 | Kanapoi    | —             |               |           |        | 4.12     | 0.04 |
| KNM-KP 35840 | Kanapoi    | —             |               |           |        | 4.12     | 0.04 |
| KNM-KP 35842 | Kanapoi    | —             |               |           |        | 4.12     | 0.04 |
